# Supplementary material for: Identification of a fatty acid metabolism-related gene signature to predict prognosis in stomach adenocarcinoma
Source: publisher site journal article supplement (doi:10.18632/aging.205823), 2024-05-13
Supplement: Supplementary file [file aging-v16i10-205823-supplementary-material-SD1.pdf]

**SUPPLEMENTARY FIGURES**

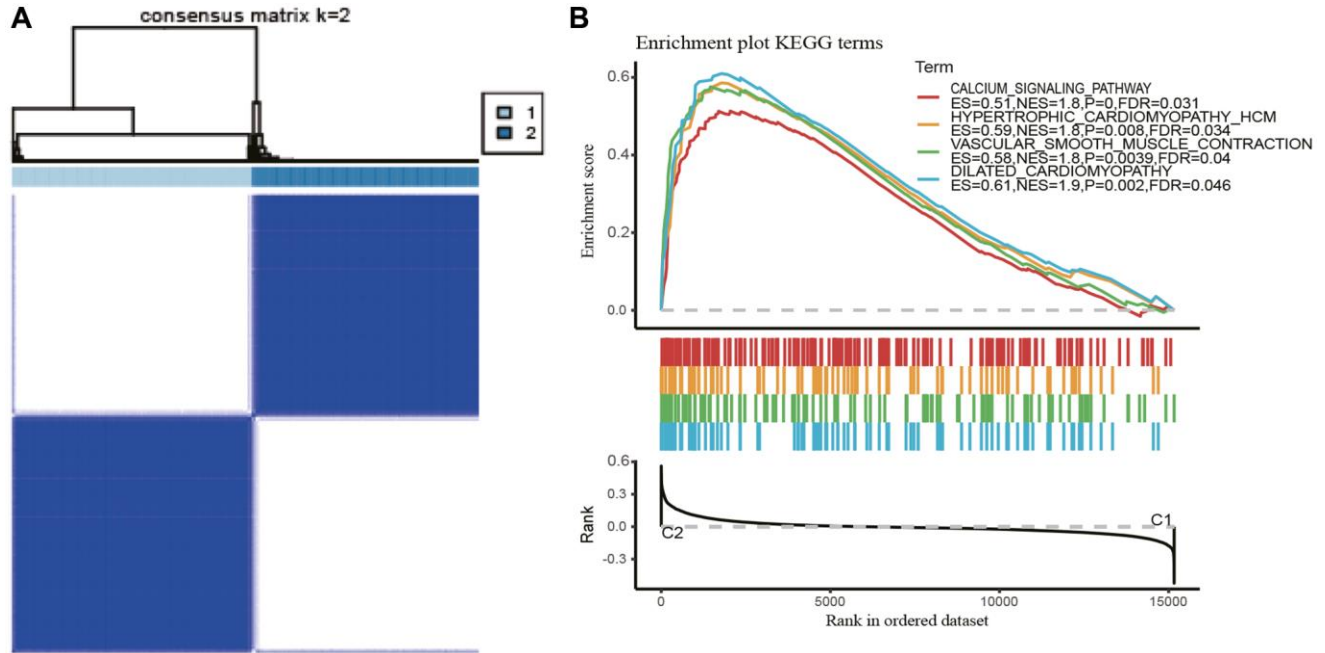

**Supplementary Figure 1. Identification of molecular subtypes and gene set enrichment analysis. (A)** Heatmap of sample clustering when k = 2 in GSE84437 dataset. **(B)** GSEA pathways score analysis between C1 and C2 in GSE84437 dataset.

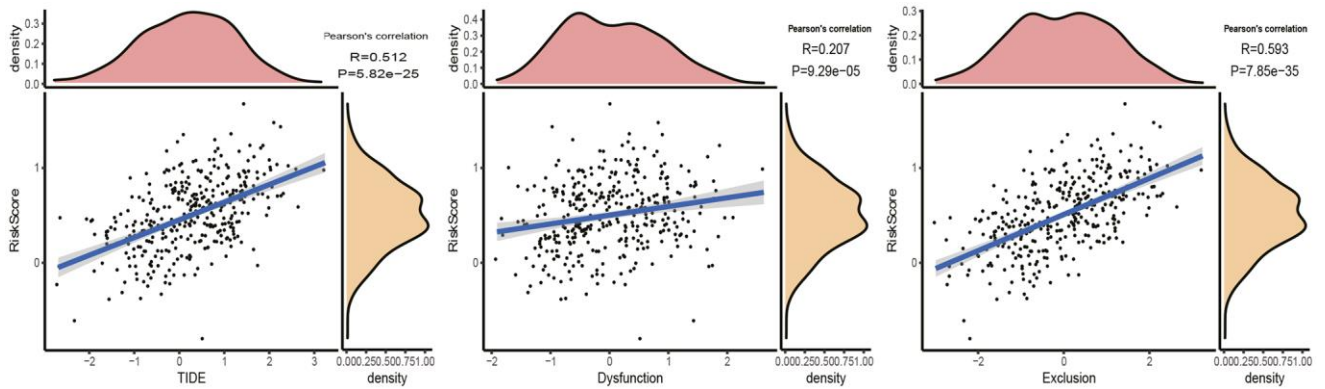

**Supplementary Figure 2. Scatter plots of correlation analysis between TIDE score and riskscore.**
